# Supplementary material for: A Single Postoperative Application of Defocused Low-Energy ESWT Does Not Significantly Enhance Regeneration of the Rat Median Nerve Following Reconstruction with Autologous Nerve Grafts or Muscle-In-Vein Conduits
Source: Preprints.org preprint supplement (doi:10.20944/preprints202206.0242.v1), 2022-06-17
Supplement: Supplementary file 1 [file Supplementary Table 1.xlsx]

## Sheet: Image Dataset Statistics
		Training	Validation	Total
	Image Count	48	6	54
	ROI Count	116	33	149
	Annotation Count	11871	3722	15593
Image Id	Image Name	Dataset	ROI	Annotations
1b31e26f-e8e7-4469-9a01-d73b14b726be	AC5753_NF#4.tif	validation	6	202
544ce47a-fa4e-4ef4-9020-40f5adda0bdc	AC5753_NF#2.tif	validation	7	127
c7584744-627a-4618-ac26-5242ae7cc2f7	AC5759_NF#1.tif	validation	4	139
06a3a391-419a-460e-b7a0-c167a3a78887	AC5759_NF#3.tif	validation	7	383
50bc7156-1236-4c78-bf97-4cbdf001e799	AC5835_NF#1.tif	training	3	274
ceab5576-5971-4774-9789-371254ab1efe	AC5844_NF#1.tif	training	5	101
7600c170-5f77-4182-9d0b-d0a098430fce	AC5844_NF#4.tif	training	4	184
cd38af4f-a01a-4d4d-b55d-e808685cac60	AC5747_NF#2.tif	training	3	131
60450ead-8236-489f-9f63-85faec763a07	AC5747_NF#3.tif	training	4	96
e2c239db-af29-47a6-9684-c212df498e94	AC5750_NF#1.tif	training	2	18
482d889b-f782-422c-b162-8d80896e7535	AC5750_NF#3.tif	training	7	306
18d9bc35-0ffe-4f34-b685-d225404b6d1b	AC5750_NF#4.tif	training	7	211
54c2cf1f-0763-4689-8d9d-f2bee563591e	AC5850_NF#1.tif	training	3	188
0346c79d-a16b-46a1-a3fa-a49b3cbb281b	AC5756_NF#3.tif	training	3	234
c5554dd0-117f-4ce3-9d2f-90483572b14a	AC5838_NF#1.tif	training	2	122
5f90fb0a-3ec3-4cdb-a965-5db5f96e7f6b	AC5838_NF#4.tif	training	4	318
269dd2e7-b9c8-4edb-9dfa-58fa8b81fd74	AC5841_+_NF#1.tif	training	3	646
74f35037-c8a0-4014-a579-e5004d32ba8b	AC5841_+_NF#4.tif	training	3	467
6acd4728-a733-4e65-95d8-54dca896f684	AC5847_NF#1.tif	training	3	266
68487a88-a57a-4255-890d-524033488884	AC5753_NF#1.tif	training	2	28
d1b56794-1b38-46d2-88a5-d58e63f69534	AC5847_NF#1.tif	training	0	0
21b727c5-6fcb-4fbc-a5b0-9fce92c9329f	AC5847_NF#4.tif	training	2	443
840c0cae-dbf7-4b25-85ff-c0c637985d9c	AC5841_+_NF#3.tif	training	4	723
9aafd768-adae-4e96-8996-a45bfcc1ba98	AC5841_+_NF#4.tif	training	0	0
6bf68dde-ab99-49ca-8c32-75149db83526	AC5841_+_NF#1.tif	training	1	175
44b619c7-309a-4c7a-a765-d82a6d35a664	AC5838_NF#1.tif	training	0	0
f793991e-d1b5-4169-84aa-4db182f5f271	AC5838_NF#4.tif	training	0	0
1c80cc18-d96e-4be8-925a-818d46637ba7	AC5756_NF#2.tif	training	2	146
c6e124d7-36da-40a8-8d03-e85a8bdb9199	AC5756_NF#4.tif	training	1	0
ff54e309-5426-4011-be1e-fe52be2084ec	AC5753_NF#3.tif	training	3	362
d768d241-7e6c-4995-b167-69e807397809	AC5759_NF#2.tif	training	2	138
d2d0e22b-d079-46a8-b838-1bd9cfe97b06	AC5759_NF#4.tif	training	2	116
e386ee7f-83dd-47d7-814b-d7937f0c6a4b	AC5835_NF#2.tif	training	2	154
ba16e8e7-8971-44b9-af6c-eb4c765aabca	AC5835_NF#3.tif	training	3	281
2902876c-fad7-4a87-9b02-73678693de8b	AC5835_NF#4.tif	training	2	387
aa882b84-bbd1-43fb-9e03-0ac195a7a17d	AC5844_NF#2.tif	training	3	157
38ceab52-bac3-48e6-9d51-7f03f40e4110	AC5844_NF#3.tif	training	0	0
61941868-55b7-46e4-b8f7-83b3a92139f9	AC5747_NF#4.tif	training	0	0
9c23e32c-b61e-443b-afcc-0f0b3b6f36c3	AC5747_NF#1.tif	training	0	0
c628e31c-94a6-4a99-ab36-e23ef50d1cf3	AC5750_NF#2.tif	training	2	356
00b5442f-4e3a-48df-a5bd-fbe1b26d2c20	AC5850_NF#2.tif	training	0	0
daf5c064-46a1-43c5-a5d4-7293567383c0	AC5850_NF#3.tif	training	0	0
3e112964-75a9-43fd-94ac-2923ed2c54d7	AC5850_NF#4.tif	training	0	0
34304960-b5ca-4db8-a772-13313f76a377	AC5756_NF#1.tif	training	1	1
e48ebc36-cdaa-4025-9f73-43de56a8427d	AC6589_NF_Scan1.tiff	training	5	917
635fe055-5083-47f2-a573-390e67510791	AC6588_NF_Scan1.tiff	training	2	838
8caf8c01-d424-47ab-898c-13b9880defb6	AC6587_NF_Scan1.tiff	training	4	890
171206fe-8c4a-4e66-bacd-143da9a310eb	AC6586_NF_Scan1.tiff	training	4	920
ecc6bae6-3f94-46dc-b98e-f08a12b1eb44	AC6581_NF_Scan1.tiff	training	5	302
bd4b1df5-543a-40f6-9a90-12cce19dd90f	AC6579_NF_Scan1.tiff	training	2	405
daeb5dbe-1f9c-4d42-8dda-0585fb0d340e	AC6576_NF_Scan1.tiff	training	2	311
46bca049-381c-4d70-bc95-848d456e31e0	AC6578_NF_Scan1.tiff	training	4	259
666e6303-4090-472b-a32d-6f33806d3765	AC6573_NF_Scan1.tiff	validation	3	884
120a634c-4879-4676-a5ed-9d462146a266	AC6590_NF_Scan1.tiff	validation	6	1987

## Sheet: Validation Image Results
ID	Image Name	Dice Coefficient	Area Precision [%]	Area Recall [%]	Instance Precision [%]	Instance Recall [%]	Instance True Positives	Instance False Positives	Instance False Negatives
1	AC5753_NF#4_ROI1	0.81	88.31	74.53	93.55	93.55	58	4	4				Ground Truth
2	AC5753_NF#4_ROI2	0.65	61.05	68.72	65	86.67	13	7	2		Confusion Matrix		TRUE	FALSE	Total
3	AC5753_NF#4_ROI3	0.89	91.19	87.37	100	96.49	55	0	2		Prediction	TRUE	3426	212	3638
4	AC5753_NF#4_ROI4	0.85	90.73	80.31	100	92.16	47	0	4			FALSE	167		167
5	AC5753_NF#4_ROI5	0	100	100	0	0	0	0	0			Total	3593	212	3805
6	AC5753_NF#4_ROI6	0	100	100	0	0	0	0	0
7	AC5753_NF#2_ROI1	0.86	90.34	81.52	91.74	96.15	100	9	4		Metrics	Precision	0.941726
8	AC5753_NF#2_ROI2	0	100	0	0	0	0	0	0			Recall	0.953521
9	AC5753_NF#2_ROI3	0	100	100	0	0	0	0	0
10	AC5753_NF#2_ROI4	0	100	100	0	0	0	0	0
11	AC5753_NF#2_ROI5	0	0	100	0	0	0	3	0		Annotations not fully within image		129
12	AC5753_NF#2_ROI6	0.19	11.11	68.42	16.67	66.67	2	10	1		Total Validation Annotations		3722
13	AC5753_NF#2_ROI7	0	100	100	0	0	0	0	0
14	AC5759_NF#1_ROI1	0.79	79.88	79.05	93.33	95.89	70	5	3
15	AC5759_NF#1_ROI2	0.83	82.25	84.52	95.65	100	44	2	0
16	AC5759_NF#1_ROI3	0.82	87.64	77.16	95.45	100	21	1	0
17	AC5759_NF#1_ROI4	0	100	100	0	0	0	0	0
18	AC5759_NF#3_ROI1	0.79	90.5	70.74	97.3	76.6	36	1	11
19	AC5759_NF#3_ROI2	0.71	83.95	62.05	100	81.25	26	0	6
20	AC5759_NF#3_ROI3	0	100	100	0	0	0	0	0
21	AC5759_NF#3_ROI4	0.81	88.42	74.22	100	83.33	20	0	4
22	AC5759_NF#3_ROI5	0.75	80.37	70.09	92.11	79.55	35	3	9
23	AC5759_NF#3_ROI6	0.83	85.13	80.52	95.61	93.78	196	9	13
24	AC5759_NF#3_ROI7	0	100	100	0	0	0	0	0
25	AC6573_NF_Scan1_ROI1	0	100	100	0	0	0	0	0
26	AC6573_NF_Scan1_ROI2	0.62	66.76	58.03	93.2	92.5	370	27	30
27	AC6573_NF_Scan1_ROI3	0.61	66.44	56.48	93.13	91.5	420	31	39
28	AC6590_NF_Scan1_ROI1	0.74	81.56	67.2	98.04	97.28	250	5	7
29	AC6590_NF_Scan1_ROI2	0.75	81.86	70.05	98.32	98.56	410	7	6
30	AC6590_NF_Scan1_ROI3	0.75	68.94	81.47	94.02	98.86	519	33	6
31	AC6590_NF_Scan1_ROI4	0.74	67.08	83.65	94.01	99.63	267	17	1
32	AC6590_NF_Scan1_ROI5	0.7	60.47	83.63	93.79	99.67	302	20	1
33	AC6590_NF_Scan1_ROI6	0.64	60.42	67.94	90.16	92.18	165	18	14
